# Supplementary material for: FLORA: A Novel Method to Predict Protein Function from Structure in Diverse Superfamilies
Source: PLoS Comput Biol. 2009 Aug 28;5(8):e1000485. doi: 10.1371/journal.pcbi.1000485 (PMC2721411; doi:10.1371/journal.pcbi.1000485)
Supplement: Dataset S1 — Benchmark data set for FLORA. (0.08 MB XLS) [file pcbi.1000485.s001.xls]

## Sheet: s60.flora.dataset
CATH domain identified (PDB:Chain:Domain number)	Functional sub-group (CATH superfamily_First3E.C.Numbers)
1kkmB00	3.40.50.300_2.7.11
1knxE02	3.40.50.300_2.7.11
1ko7A02	3.40.50.300_2.7.11
1kgdA01	3.40.50.300_2.7.11
1u9iA02	3.40.50.300_2.7.11
1tf7A01	3.40.50.300_2.7.11
1qdeA00	3.40.50.300_3.6.1
1pjr001	3.40.50.300_3.6.1
2gxaA02	3.40.50.300_3.6.1
1uaaB03	3.40.50.300_3.6.1
1vecA00	3.40.50.300_3.6.1
1hv8A01	3.40.50.300_3.6.1
1pv4A02	3.40.50.300_3.6.1
1uaaA01	3.40.50.300_3.6.1
2g9nA00	3.40.50.300_3.6.1
1t9hA02	3.40.50.300_3.6.1
2pjrA03	3.40.50.300_3.6.1
2g2jA00	3.40.50.300_3.6.1
1fukA00	3.40.50.300_3.6.1
1tueD00	3.40.50.300_3.6.1
1in4A01	3.40.50.300_3.6.1
1g8fA03	3.40.50.300_2.7.7
1jqlB00	3.40.50.300_2.7.7
1a5t001	3.40.50.300_2.7.7
1njgA01	3.40.50.300_2.7.7
1m8pA03	3.40.50.300_2.7.7
1cr2A00	3.40.50.300_2.7.7
1sq5C00	3.40.50.300_2.7.1
1e2kA00	3.40.50.300_2.7.1
1uj2A00	3.40.50.300_2.7.1
1m7gC00	3.40.50.300_2.7.1
1p72A00	3.40.50.300_2.7.1
1a7j000	3.40.50.300_2.7.1
1uf9A00	3.40.50.300_2.7.1
1p5zB00	3.40.50.300_2.7.1
1osnC00	3.40.50.300_2.7.1
1ly1A00	3.40.50.300_2.7.1
1zm7B00	3.40.50.300_2.7.1
2g1kA00	3.40.50.300_2.7.1
1vhtA00	3.40.50.300_2.7.1
1kagA00	3.40.50.300_2.7.1
2getA00	3.40.50.300_2.7.1
1qhxA00	3.40.50.300_2.7.1
1knqA00	3.40.50.300_2.7.1
1jagA00	3.40.50.300_2.7.1
1jjvA00	3.40.50.300_2.7.1
1e6cA00	3.40.50.300_2.7.1
1q1zA00	3.40.50.300_2.8.2
1cjmA00	3.40.50.300_2.8.2
1aquB00	3.40.50.300_2.8.2
1q44A00	3.40.50.300_2.8.2
2etgB00	3.40.50.300_2.8.2
1zrhA00	3.40.50.300_2.8.2
1nstA00	3.40.50.300_2.8.2
1xv1A00	3.40.50.300_2.8.2
1j99A00	3.40.50.300_2.8.2
1zd1A00	3.40.50.300_2.8.2
1t8tA00	3.40.50.300_2.8.2
1zin000	3.40.50.300_2.7.4
1dekA01	3.40.50.300_2.7.4
1qf9A00	3.40.50.300_2.7.4
3tmkD00	3.40.50.300_2.7.4
1ex7A02	3.40.50.300_2.7.4
1ukz000	3.40.50.300_2.7.4
1s96A01	3.40.50.300_2.7.4
2bwjA00	3.40.50.300_2.7.4
1tevA00	3.40.50.300_2.7.4
1ckeA00	3.40.50.300_2.7.4
1aky000	3.40.50.300_2.7.4
1z83A00	3.40.50.300_2.7.4
1znwA01	3.40.50.300_2.7.4
1nn3A00	3.40.50.300_2.7.4
1zakA00	3.40.50.300_2.7.4
2cdnA00	3.40.50.300_2.7.4
1e4vA00	3.40.50.300_2.7.4
1ak2000	3.40.50.300_2.7.4
1lvgA02	3.40.50.300_2.7.4
1khtB00	3.40.50.300_2.7.4
1gtvA00	3.40.50.300_2.7.4
1nksA00	3.40.50.300_2.7.4
1zd8A00	3.40.50.300_2.7.4
4tmkA00	3.40.50.300_2.7.4
2bbwA00	3.40.50.300_2.7.4
1ihuA01	3.40.50.300_3.6.3
1l7vC00	3.40.50.300_3.6.3
2ck3D02	3.40.50.300_3.6.3
2ck3A02	3.40.50.300_3.6.3
2awnB01	3.40.50.300_3.6.3
1fg7A01	3.40.640.10_2.6.1
1mdoA01	3.40.640.10_2.6.1
1bw0A02	3.40.640.10_2.6.1
2oatA02	3.40.640.10_2.6.1
1uu1A02	3.40.640.10_2.6.1
1yaaA02	3.40.640.10_2.6.1
1bjnA01	3.40.640.10_2.6.1
1ajsB02	3.40.640.10_2.6.1
1s0aA02	3.40.640.10_2.6.1
1ars002	3.40.640.10_2.6.1
2c0rA01	3.40.640.10_2.6.1
1o4sA02	3.40.640.10_2.6.1
3tatA02	3.40.640.10_2.6.1
7aatA02	3.40.640.10_2.6.1
2ay1A02	3.40.640.10_2.6.1
1b5pA02	3.40.640.10_2.6.1
1js3A02	3.40.640.10_4.1.1
1zodA02	3.40.640.10_4.1.1
1c4kA02	3.40.640.10_4.1.1
1lc5A02	3.40.640.10_4.1.1
1ukjA01	3.40.640.10_4.4.1
1m7yA02	3.40.640.10_4.4.1
1ibjA01	3.40.640.10_4.4.1
1d2fA02	3.40.640.10_4.4.1
1iayA02	3.40.640.10_4.4.1
1lk9A02	3.40.640.10_4.4.1
1cl1A01	3.40.640.10_4.4.1
1n8pA01	3.40.640.10_4.4.1
1i52A00	3.90.550.10_2.7.7
1tzfA00	3.90.550.10_2.7.7
1h7eA00	3.90.550.10_2.7.7
1vgwB00	3.90.550.10_2.7.7
1eziA00	3.90.550.10_2.7.7
1vicA00	3.90.550.10_2.7.7
1qwjB00	3.90.550.10_2.7.7
1vpaA00	3.90.550.10_2.7.7
1jv1A01	3.90.550.10_2.7.7
1v84A00	3.90.550.10_2.4.1
1ll3A00	3.90.550.10_2.4.1
1o7qA00	3.90.550.10_2.4.1
1s4nB00	3.90.550.10_2.4.1
1omzB00	3.90.550.10_2.4.1
1kwsA00	3.90.550.10_2.4.1
2apcA01	3.90.550.10_2.4.1
1lgyA00	3.40.50.1820_3.1.1
1cex000	3.40.50.1820_3.1.1
1tca000	3.40.50.1820_3.1.1
1m33A00	3.40.50.1820_3.1.1
1va4A00	3.40.50.1820_3.1.1
1ex9A00	3.40.50.1820_3.1.1
1dx4A00	3.40.50.1820_3.1.1
1llfA00	3.40.50.1820_3.1.1
1zi8A00	3.40.50.1820_3.1.1
1ys1X00	3.40.50.1820_3.1.1
1p0iA00	3.40.50.1820_3.1.1
1ju3A01	3.40.50.1820_3.1.1
1tqhA00	3.40.50.1820_3.1.1
2h7cB00	3.40.50.1820_3.1.1
1auoA00	3.40.50.1820_3.1.1
1k8qA00	3.40.50.1820_3.1.1
1uwcA00	3.40.50.1820_3.1.1
2ha2B00	3.40.50.1820_3.1.1
1g66A00	3.40.50.1820_3.1.1
1qgeD00	3.40.50.1820_3.1.1
1bu8A01	3.40.50.1820_3.1.1
1qe3A00	3.40.50.1820_3.1.1
1ea5A00	3.40.50.1820_3.1.1
1tib000	3.40.50.1820_3.1.1
1ispA00	3.40.50.1820_3.1.1
1thg000	3.40.50.1820_3.1.1
3tgl000	3.40.50.1820_3.1.1
1whtA00	3.40.50.1820_3.4.16
1cpy001	3.40.50.1820_3.4.16
1ac5000	3.40.50.1820_3.4.16
1ivyB00	3.40.50.1820_3.4.16
1x1nA01	3.20.20.80_2.4.1
1d3cA01	3.20.20.80_2.4.1
1m7xD02	3.20.20.80_2.4.1
1eswA00	3.20.20.80_2.4.1
1lwjA01	3.20.20.80_2.4.1
1nowA02	3.20.20.80_3.2.1
2nt0A01	3.20.20.80_3.2.1
1r85A00	3.20.20.80_3.2.1
1jz7A03	3.20.20.80_3.2.1
1edg000	3.20.20.80_3.2.1
1w32A00	3.20.20.80_3.2.1
1itxA01	3.20.20.80_3.2.1
1wb0A01	3.20.20.80_3.2.1
1ji1A02	3.20.20.80_3.2.1
1jae001	3.20.20.80_3.2.1
1edt000	3.20.20.80_3.2.1
1h09A01	3.20.20.80_3.2.1
1ceo000	3.20.20.80_3.2.1
1cz1A00	3.20.20.80_3.2.1
1wdpA00	3.20.20.80_3.2.1
1ghsA00	3.20.20.80_3.2.1
1hx0A01	3.20.20.80_3.2.1
1bf2002	3.20.20.80_3.2.1
1qhoA01	3.20.20.80_3.2.1
1e4iA00	3.20.20.80_3.2.1
1uhvA02	3.20.20.80_3.2.1
1vemA01	3.20.20.80_3.2.1
1gcyA01	3.20.20.80_3.2.1
1jfxA00	3.20.20.80_3.2.1
1eokA00	3.20.20.80_3.2.1
1fobA00	3.20.20.80_3.2.1
1bvzA02	3.20.20.80_3.2.1
1xyzA00	3.20.20.80_3.2.1
1hjsA00	3.20.20.80_3.2.1
1h4pA00	3.20.20.80_3.2.1
1g0cA00	3.20.20.80_3.2.1
1uwsA00	3.20.20.80_3.2.1
1cbg000	3.20.20.80_3.2.1
1v0lA00	3.20.20.80_3.2.1
1eceA00	3.20.20.80_3.2.1
1bhgA03	3.20.20.80_3.2.1
2cbuA00	3.20.20.80_3.2.1
1b1yA00	3.20.20.80_3.2.1
1ht6A01	3.20.20.80_3.2.1
1c7sA03	3.20.20.80_3.2.1
1g94A01	3.20.20.80_3.2.1
1e4mM00	3.20.20.80_3.2.1
1odzA00	3.20.20.80_3.2.1
1i1wA00	3.20.20.80_3.2.1
1ua7A01	3.20.20.80_3.2.1
1uok001	3.20.20.80_3.2.1
2ebn000	3.20.20.80_3.2.1
1aq0A00	3.20.20.80_3.2.1
1pbgA00	3.20.20.80_3.2.1
7a3hA00	3.20.20.80_3.2.1
1lufA01	3.30.200.20_2.7.10
1ywnA01	3.30.200.20_2.7.10
1r1wA01	3.30.200.20_2.7.10
1opjB01	3.30.200.20_2.7.10
1k2pA01	3.30.200.20_2.7.10
1xbbA01	3.30.200.20_2.7.10
1fmk003	3.30.200.20_2.7.10
1fvrA01	3.30.200.20_2.7.10
1p4oA01	3.30.200.20_2.7.10
1jpaA01	3.30.200.20_2.7.10
1rjbA01	3.30.200.20_2.7.10
1t45A01	3.30.200.20_2.7.10
1fgkB01	3.30.200.20_2.7.10
1k9aA03	3.30.200.20_2.7.10
1m14A01	3.30.200.20_2.7.10
1mp8A01	3.30.200.20_2.7.10
1u4dA01	3.30.200.20_2.7.10
1t46A01	3.30.200.20_2.7.10
1u59A01	3.30.200.20_2.7.10
1yhvA01	3.30.200.20_2.7.11
1blxA01	3.30.200.20_2.7.11
2b1pA01	3.30.200.20_2.7.11
1xjdA01	3.30.200.20_2.7.11
2izrA01	3.30.200.20_2.7.11
1jksA01	3.30.200.20_2.7.11
1q8yA01	3.30.200.20_2.7.11
1b6cB01	3.30.200.20_2.7.11
1t4hB01	3.30.200.20_2.7.11
1gz8A01	3.30.200.20_2.7.11
1tkiA01	3.30.200.20_2.7.11
1ia9A01	3.30.200.20_2.7.11
1wbsA01	3.30.200.20_2.7.11
1tvoA01	3.30.200.20_2.7.11
1nxkA01	3.30.200.20_2.7.11
1xwsA01	3.30.200.20_2.7.11
1rdqE02	3.30.200.20_2.7.11
1o6lA02	3.30.200.20_2.7.11
2iwiB01	3.30.200.20_2.7.11
1uu3A02	3.30.200.20_2.7.11
2i6lA01	3.30.200.20_2.7.11
1csn001	3.30.200.20_2.7.11
1o6yA01	3.30.200.20_2.7.11
1ymiA02	3.30.200.20_2.7.11
1ywrA01	3.30.200.20_2.7.11
1vjyA01	3.30.200.20_2.7.11
1wakA01	3.30.200.20_2.7.11
1pme001	3.30.200.20_2.7.11
1gzkA02	3.30.200.20_2.7.11
1phk001	3.30.200.20_2.7.11
1a06001	3.30.200.20_2.7.11
1zrzA01	3.30.200.20_2.7.11
1q5kA01	3.30.200.20_2.7.11
1ckiA01	3.30.200.20_2.7.11
2j0iA01	3.30.200.20_2.7.11
1fotA02	3.30.200.20_2.7.11
1ia8A01	3.30.200.20_2.7.11
2fb8A01	3.30.200.20_2.7.11
1ar1B01	2.60.40.420_1.9.3
1v54B02	2.60.40.420_1.9.3
2gsmB02	2.60.40.420_1.9.3
2cuaB00	2.60.40.420_1.9.3
1aozA01	2.60.40.420_1.10.3
1cyx000	2.60.40.420_1.10.3
1gw0A03	2.60.40.420_1.10.3
1gycA03	2.60.40.420_1.10.3
2ih8A01	2.60.40.420_1.10.3
1yf3A01	3.40.50.150_2.1.1
1v39000	3.40.50.150_2.1.1
1wg8A01	3.40.50.150_2.1.1
1ri5A00	3.40.50.150_2.1.1
1fp1D02	3.40.50.150_2.1.1
1jg1A00	3.40.50.150_2.1.1
1kyzA02	3.40.50.150_2.1.1
1nw3A02	3.40.50.150_2.1.1
1g38A01	3.40.50.150_2.1.1
1kpiA00	3.40.50.150_2.1.1
1xvaA02	3.40.50.150_2.1.1
2dpmA01	3.40.50.150_2.1.1
1ej0A00	3.40.50.150_2.1.1
1m6yA01	3.40.50.150_2.1.1
1eg2A00	3.40.50.150_2.1.1
1zx0D00	3.40.50.150_2.1.1
1jqeA00	3.40.50.150_2.1.1
1yub001	3.40.50.150_2.1.1
1g60B00	3.40.50.150_2.1.1
1l3iA00	3.40.50.150_2.1.1
1qyrA01	3.40.50.150_2.1.1
2g8nA00	3.40.50.150_2.1.1
1r18A00	3.40.50.150_2.1.1
1pjzA00	3.40.50.150_2.1.1
1f3lA01	3.40.50.150_2.1.1
2c7pA01	3.40.50.150_2.1.1
1dl5A01	3.40.50.150_2.1.1
1fpxA02	3.40.50.150_2.1.1
1booA00	3.40.50.150_2.1.1
1sqgA04	3.40.50.150_2.1.1
2cl5A00	3.40.50.150_2.1.1
1qamA01	3.40.50.150_2.1.1
1dctA01	3.40.50.150_2.1.1
1af7002	3.40.50.150_2.1.1
1i1nA00	3.40.50.150_2.1.1
1iy9A01	3.40.50.150_2.5.1
1mjfB02	3.40.50.150_2.5.1
1xj5B02	3.40.50.150_2.5.1
1inlD01	3.40.50.150_2.5.1
1bhe000	2.160.20.10_3.2.1
1nhcA00	2.160.20.10_3.2.1
1hg8A00	2.160.20.10_3.2.1
1rmg000	2.160.20.10_3.2.1
1ogoX02	2.160.20.10_3.2.1
1czfA00	2.160.20.10_3.2.1
1o88A00	2.160.20.10_4.2.2
1pe9A00	2.160.20.10_4.2.2
1qcxA00	2.160.20.10_4.2.2
1ru4A00	2.160.20.10_4.2.2
1bn8A00	2.160.20.10_4.2.2
1oflA00	2.160.20.10_4.2.2
1ngnA00	1.10.340.30_3.2.2
1keaA02	1.10.340.30_3.2.2
1mpgA02	1.10.340.30_3.2.2
1lmzA00	1.10.340.30_3.2.2
1kg2A02	1.10.340.30_3.2.2
1xqoA02	1.10.340.30_4.2.99
1m3qA03	1.10.340.30_4.2.99
1xg7A02	1.10.340.30_4.2.99
2abk001	1.10.340.30_4.2.99
1autC02	2.40.10.10_3.4.21
1ekbB01	2.40.10.10_3.4.21
1sotA01	2.40.10.10_3.4.21
1arb001	2.40.10.10_3.4.21
1ky9A02	2.40.10.10_3.4.21
2bz6H01	2.40.10.10_3.4.21
2o8lA01	2.40.10.10_3.4.21
1eaxA02	2.40.10.10_3.4.21
1dleB02	2.40.10.10_3.4.21
2bdhA01	2.40.10.10_3.4.21
1eq9A01	2.40.10.10_3.4.21
1azzA02	2.40.10.10_3.4.21
1gj7B02	2.40.10.10_3.4.21
1lcyA01	2.40.10.10_3.4.21
1gpzA03	2.40.10.10_3.4.21
2cf8H02	2.40.10.10_3.4.21
1fujA01	2.40.10.10_3.4.21
1zhrA01	2.40.10.10_3.4.21
1mzaA02	2.40.10.10_3.4.21
1hj9A01	2.40.10.10_3.4.21
1vcpA01	2.40.10.10_3.4.21
1yphC00	2.40.10.10_3.4.21
1ep5A01	2.40.10.10_3.4.21
1yc0A02	2.40.10.10_3.4.21
1bqyA02	2.40.10.10_3.4.21
2sga002	2.40.10.10_3.4.21
1dleA01	2.40.10.10_3.4.21
1sgpE01	2.40.10.10_3.4.21
1yphE00	2.40.10.10_3.4.21
1hj8A01	2.40.10.10_3.4.21
1npmA01	2.40.10.10_3.4.21
1p57B02	2.40.10.10_3.4.21
1elvA02	2.40.10.10_3.4.21
1c5mD02	2.40.10.10_3.4.21
2pkaA00	2.40.10.10_3.4.21
1agjA02	2.40.10.10_3.4.21
1ezxC00	2.40.10.10_3.4.21
2f9nA02	2.40.10.10_3.4.21
1fiwA02	2.40.10.10_3.4.21
2hlcA01	2.40.10.10_3.4.21
1te0A02	2.40.10.10_3.4.21
1bruP02	2.40.10.10_3.4.21
1gctA02	2.40.10.10_3.4.21
1gvkB02	2.40.10.10_3.4.21
1z8gA02	2.40.10.10_3.4.21
1ao5A02	2.40.10.10_3.4.21
1rtfB02	2.40.10.10_3.4.21
1md8A01	2.40.10.10_3.4.21
1eufA01	2.40.10.10_3.4.21
1lo6A01	2.40.10.10_3.4.21
1svpA02	2.40.10.10_3.4.21
2sfa001	2.40.10.10_3.4.21
1riwB00	2.40.10.10_3.4.21
1ddjA02	2.40.10.10_3.4.21
3rp2A02	2.40.10.10_3.4.21
1gvzA02	2.40.10.10_3.4.21
1aksB00	2.40.10.10_3.4.21
1qtfA02	2.40.10.10_3.4.21
1ton002	2.40.10.10_3.4.21
2aipA01	2.40.10.10_3.4.21
2bokA01	2.40.10.10_3.4.21
2h5cA02	2.40.10.10_3.4.21
1orfA01	2.40.10.10_3.4.21
1ppfE01	2.40.10.10_3.4.21
1hpgA02	2.40.10.10_3.4.21
1rfnA01	2.40.10.10_3.4.21
1cghA01	2.40.10.10_3.4.21
1pq7A01	2.40.10.10_3.4.21
1bio002	2.40.10.10_3.4.21
1nn6A01	2.40.10.10_3.4.21
1ucyE00	2.40.10.10_3.4.21
1os8A01	2.40.10.10_3.4.21
1mbmA01	2.40.10.10_2.7.7
1lvoA01	2.40.10.10_2.7.7
2gt7B02	2.40.10.10_2.7.7
2gt7A01	2.40.10.10_2.7.7
1kh2C01	3.40.50.620_6.3.4
1k92A01	3.40.50.620_6.3.4
1korC01	3.40.50.620_6.3.4
1vl2A01	3.40.50.620_6.3.4
1y42X01	3.40.50.620_6.1.1
1irxA01	3.40.50.620_6.1.1
1zh0A01	3.40.50.620_6.1.1
2ts1001	3.40.50.620_6.1.1
2d5bA01	3.40.50.620_6.1.1
1qtqA05	3.40.50.620_6.1.1
1n3lA01	3.40.50.620_6.1.1
2csxA01	3.40.50.620_6.1.1
1wkbA01	3.40.50.620_6.1.1
1r6uB01	3.40.50.620_6.1.1
1f7uA01	3.40.50.620_6.1.1
1wq4A01	3.40.50.620_6.1.1
1j09A01	3.40.50.620_6.1.1
2cycA01	3.40.50.620_6.1.1
1ile001	3.40.50.620_6.1.1
2cyaA01	3.40.50.620_6.1.1
1i6kA01	3.40.50.620_6.1.1
1gaxA01	3.40.50.620_6.1.1
1h3fB01	3.40.50.620_6.1.1
1pfvA02	3.40.50.620_6.1.1
1ej2A00	3.40.50.620_2.7.7
1k4kB00	3.40.50.620_2.7.7
1f9aA00	3.40.50.620_2.7.7
1tfuA00	3.40.50.620_2.7.7
1jhdA01	3.40.50.620_2.7.7
1kamA00	3.40.50.620_2.7.7
1r6xA02	3.40.50.620_2.7.7
1qjcA00	3.40.50.620_2.7.7
1cozA00	3.40.50.620_2.7.7
1o6bA00	3.40.50.620_2.7.7
1nupB00	3.40.50.620_2.7.7
1vlhB00	3.40.50.620_2.7.7
2g1iA01	3.40.50.970_4.1.1
1q6zA03	3.40.50.970_4.1.1
1zpdA03	3.40.50.970_4.1.1
1ovmA01	3.40.50.970_4.1.1
1qgdA02	3.40.50.970_2.2.1
1itzA02	3.40.50.970_2.2.1
1jscB01	3.40.50.970_2.2.1
1ozhB03	3.40.50.970_2.2.1
1ybhA01	3.40.50.970_2.2.1
1ozhD01	3.40.50.970_2.2.1
1gpuA02	3.40.50.970_2.2.1
1qs0B01	3.40.50.970_1.2.4
1ni4A00	3.40.50.970_1.2.4
1w85B01	3.40.50.970_1.2.4
1qs0A00	3.40.50.970_1.2.4
1ni4B01	3.40.50.970_1.2.4
2bfdA00	3.40.50.970_1.2.4
2bfdB01	3.40.50.970_1.2.4
1js3A03	3.90.1150.10_4.1.1
1zodA01	3.90.1150.10_4.1.1
1lc5A01	3.90.1150.10_4.1.1
1c4kA03	3.90.1150.10_4.1.1
1bw0B01	3.90.1150.10_2.6.1
1s0aA01	3.90.1150.10_2.6.1
2oatA01	3.90.1150.10_2.6.1
1yaaA01	3.90.1150.10_2.6.1
7aatA01	3.90.1150.10_2.6.1
1uu1B01	3.90.1150.10_2.6.1
2ay1A01	3.90.1150.10_2.6.1
1z7dA01	3.90.1150.10_2.6.1
1fg7A02	3.90.1150.10_2.6.1
1uu2B01	3.90.1150.10_2.6.1
2c0rA02	3.90.1150.10_2.6.1
3tatA01	3.90.1150.10_2.6.1
1mdoA02	3.90.1150.10_2.6.1
1ajsA01	3.90.1150.10_2.6.1
1o4sA01	3.90.1150.10_2.6.1
1ars001	3.90.1150.10_2.6.1
5bj4A01	3.90.1150.10_2.6.1
1bjnA02	3.90.1150.10_2.6.1
1m7yA01	3.90.1150.10_4.4.1
1n8pA02	3.90.1150.10_4.4.1
2fq6A02	3.90.1150.10_4.4.1
1d2fB01	3.90.1150.10_4.4.1
1ukjA02	3.90.1150.10_4.4.1
1iayA01	3.90.1150.10_4.4.1
1ibjA02	3.90.1150.10_4.4.1
1lk9A03	3.90.1150.10_4.4.1
1gytL02	3.40.630.10_3.4.11
1rtqA00	3.40.630.10_3.4.11
1vixA01	3.40.630.10_3.4.11
2gljA01	3.40.630.10_3.4.11
1tkjA00	3.40.630.10_3.4.11
1y7eA01	3.40.630.10_3.4.11
1obr000	3.40.630.10_3.4.17
1uwyA01	3.40.630.10_3.4.17
5cpa000	3.40.630.10_3.4.17
1h8lA01	3.40.630.10_3.4.17
1cg2A01	3.40.630.10_3.4.17
1gd1O02	3.30.360.10_1.2.1
2czcA02	3.30.360.10_1.2.1
1b7gO02	3.30.360.10_1.2.1
1u8fO02	3.30.360.10_1.2.1
1cf2O02	3.30.360.10_1.2.1
1k3tA02	3.30.360.10_1.2.1
1brmA02	3.30.360.10_1.2.1
1rm4A02	3.30.360.10_1.2.1
1lc0A02	3.30.360.10_1.3.1
1p9lA02	3.30.360.10_1.3.1
1vm6A02	3.30.360.10_1.3.1
1dih002	3.30.360.10_1.3.1
1opjA02	1.10.510.10_2.7.10
1lufA02	1.10.510.10_2.7.10
1rjbA02	1.10.510.10_2.7.10
2src004	1.10.510.10_2.7.10
1xbbA02	1.10.510.10_2.7.10
1mp8A02	1.10.510.10_2.7.10
1fvrA02	1.10.510.10_2.7.10
1ywnA02	1.10.510.10_2.7.10
1jpaA02	1.10.510.10_2.7.10
1t46A02	1.10.510.10_2.7.10
1k2pA02	1.10.510.10_2.7.10
1p4oA02	1.10.510.10_2.7.10
1xkkA02	1.10.510.10_2.7.10
1bygA02	1.10.510.10_2.7.10
1sm2A02	1.10.510.10_2.7.10
1u46B02	1.10.510.10_2.7.10
1r0pA02	1.10.510.10_2.7.10
1fgkA02	1.10.510.10_2.7.10
1jksA02	1.10.510.10_2.7.11
2izrA02	1.10.510.10_2.7.11
1uu3A01	1.10.510.10_2.7.11
1rdqE01	1.10.510.10_2.7.11
1yhvA02	1.10.510.10_2.7.11
1t4hA02	1.10.510.10_2.7.11
2b1pA02	1.10.510.10_2.7.11
1vjyA02	1.10.510.10_2.7.11
1zrzA02	1.10.510.10_2.7.11
1q8yA02	1.10.510.10_2.7.11
1wbsA02	1.10.510.10_2.7.11
1o6lA01	1.10.510.10_2.7.11
1wakA02	1.10.510.10_2.7.11
1phk002	1.10.510.10_2.7.11
2i6lA02	1.10.510.10_2.7.11
1xjdA02	1.10.510.10_2.7.11
1a06002	1.10.510.10_2.7.11
1unlA02	1.10.510.10_2.7.11
1o6yA02	1.10.510.10_2.7.11
1xwsA02	1.10.510.10_2.7.11
1fotA01	1.10.510.10_2.7.11
1kwpB02	1.10.510.10_2.7.11
1vzoA02	1.10.510.10_2.7.11
1ymiA01	1.10.510.10_2.7.11
2j0iA02	1.10.510.10_2.7.11
1tkiA02	1.10.510.10_2.7.11
1csn002	1.10.510.10_2.7.11
1uwhA02	1.10.510.10_2.7.11
1gz8A02	1.10.510.10_2.7.11
1ia8A02	1.10.510.10_2.7.11
1q3dA02	1.10.510.10_2.7.11
1pme002	1.10.510.10_2.7.11
1blxA02	1.10.510.10_2.7.11
1e7wB00	3.40.50.720_1.5.1
1lu9B02	3.40.50.720_1.5.1
1edzA01	3.40.50.720_1.5.1
1ff9A01	3.40.50.720_1.5.1
1dhr000	3.40.50.720_1.5.1
1bg6001	3.40.50.720_1.5.1
1brmA01	3.40.50.720_1.2.1
1gadO01	3.40.50.720_1.2.1
1gd1O01	3.40.50.720_1.2.1
1k3tA01	3.40.50.720_1.2.1
1cf2O01	3.40.50.720_1.2.1
1kolA02	3.40.50.720_1.2.1
1gpjA02	3.40.50.720_1.2.1
1rm4A01	3.40.50.720_1.2.1
2czcA01	3.40.50.720_1.2.1
2nacA02	3.40.50.720_1.2.1
1hdgO01	3.40.50.720_1.2.1
1u8fO01	3.40.50.720_1.2.1
1cerO01	3.40.50.720_1.2.1
1b7gO01	3.40.50.720_1.2.1
1hwxA03	3.40.50.720_1.4.1
2tmgA02	3.40.50.720_1.4.1
1f06A01	3.40.50.720_1.4.1
1j5pA01	3.40.50.720_1.4.1
1bgvA01	3.40.50.720_1.4.1
1gtmA02	3.40.50.720_1.4.1
1j6uA01	3.40.50.720_6.3.2
1yovD01	3.40.50.720_6.3.2
1p3dA01	3.40.50.720_6.3.2
4uagA01	3.40.50.720_6.3.2
1bdb000	3.40.50.720_1.3.1
1gteA03	3.40.50.720_1.3.1
1yl5A01	3.40.50.720_1.3.1
1dih001	3.40.50.720_1.3.1
1ps9A02	3.40.50.720_1.3.1
1lc0A01	3.40.50.720_1.3.1
1jw7A00	3.40.50.720_1.3.1
1d7oA00	3.40.50.720_1.3.1
1qsgA00	3.40.50.720_1.3.1
1vm6B01	3.40.50.720_1.3.1
2h7iA00	3.40.50.720_1.3.1
1smkA01	3.40.50.720_1.1.1
1dljA01	3.40.50.720_1.1.1
1jtvA00	3.40.50.720_1.1.1
1xq1A00	3.40.50.720_1.1.1
1o6zA02	3.40.50.720_1.1.1
1f0yA01	3.40.50.720_1.1.1
1geeA00	3.40.50.720_1.1.1
1j4aA02	3.40.50.720_1.1.1
2ae2A00	3.40.50.720_1.1.1
2hcyA02	3.40.50.720_1.1.1
1np3B01	3.40.50.720_1.1.1
1nytA02	3.40.50.720_1.1.1
1jvbA02	3.40.50.720_1.1.1
1n8kA02	3.40.50.720_1.1.1
1fmcA00	3.40.50.720_1.1.1
1ygyA02	3.40.50.720_1.1.1
1pl8A02	3.40.50.720_1.1.1
2cmd001	3.40.50.720_1.1.1
1ur5C01	3.40.50.720_1.1.1
1guzA01	3.40.50.720_1.1.1
1ojuA01	3.40.50.720_1.1.1
1kbzA01	3.40.50.720_1.1.1
1ldnA01	3.40.50.720_1.1.1
1y7tA01	3.40.50.720_1.1.1
1h5qA00	3.40.50.720_1.1.1
1iy8A00	3.40.50.720_1.1.1
2ldx001	3.40.50.720_1.1.1
1ez4B01	3.40.50.720_1.1.1
1e3iA02	3.40.50.720_1.1.1
7mdhA01	3.40.50.720_1.1.1
1gegA00	3.40.50.720_1.1.1
1mfzA01	3.40.50.720_1.1.1
1e6uA01	3.40.50.720_1.1.1
1sbyA00	3.40.50.720_1.1.1
1oaa000	3.40.50.720_1.1.1
1p77A02	3.40.50.720_1.1.1
2pgd001	3.40.50.720_1.1.1
1cydA00	3.40.50.720_1.1.1
9ldtA01	3.40.50.720_1.1.1
1mx3A02	3.40.50.720_1.1.1
2bh9A01	3.40.50.720_1.1.1
1ebfA01	3.40.50.720_1.1.1
1dxy002	3.40.50.720_1.1.1
1xu9C00	3.40.50.720_1.1.1
1vi2A02	3.40.50.720_1.1.1
2hrbA00	3.40.50.720_1.1.1
1hdcA00	3.40.50.720_1.1.1
1hyhA01	3.40.50.720_1.1.1
1p0fA02	3.40.50.720_1.1.1
1qr6A02	3.40.50.720_1.1.1
1ks9A01	3.40.50.720_1.1.1
6ldh001	3.40.50.720_1.1.1
1piwA02	3.40.50.720_1.1.1
1ybaA02	3.40.50.720_1.1.1
1j4aD01	3.40.50.720_1.1.1
5mdhA01	3.40.50.720_1.1.1
1nffA00	3.40.50.720_1.1.1
1nvtA02	3.40.50.720_1.1.1
1lldA01	3.40.50.720_1.1.1
1k2wA00	3.40.50.720_1.1.1
1gdhA02	3.40.50.720_1.1.1
1qmgB01	3.40.50.720_1.1.1
1pgjA01	3.40.50.720_1.1.1
1hxhA00	3.40.50.720_1.1.1
1txgA01	3.40.50.720_1.1.1
1a5z001	3.40.50.720_1.1.1
1evyA01	3.40.50.720_1.1.1
1g0nB00	3.40.50.720_1.1.1
2cfcA00	3.40.50.720_1.1.1
1t2dA01	3.40.50.720_1.1.1
1y9aA02	3.40.50.720_1.1.1
1dpgA01	3.40.50.720_1.1.1
1edoA00	3.40.50.720_1.1.1
1pvgA01	3.30.565.10_5.99.1
1aj6000	3.30.565.10_5.99.1
1s16A01	3.30.565.10_5.99.1
1zxmA01	3.30.565.10_5.99.1
1mu5A01	3.30.565.10_5.99.1
1s14B00	3.30.565.10_5.99.1
1id0A00	3.30.565.10_2.7.13
1i58A00	3.30.565.10_2.7.13
1bxdA00	3.30.565.10_2.7.13
1r62A00	3.30.565.10_2.7.13
1nm3A01	3.40.30.10_1.11.1
2f8aB00	3.40.30.10_1.11.1
1xvqA00	3.40.30.10_1.11.1
1n8jA00	3.40.30.10_1.11.1
1psqA00	3.40.30.10_1.11.1
2i3yA01	3.40.30.10_1.11.1
1q98A00	3.40.30.10_1.11.1
1hd2A00	3.40.30.10_1.11.1
1qq2A00	3.40.30.10_1.11.1
1eemA01	3.40.30.10_2.5.1
1axdA01	3.40.30.10_2.5.1
1k3yA01	3.40.30.10_2.5.1
1tu7A01	3.40.30.10_2.5.1
1m0uA01	3.40.30.10_2.5.1
1oe8A01	3.40.30.10_2.5.1
1n2aA01	3.40.30.10_2.5.1
2c4jA01	3.40.30.10_2.5.1
1gnwA01	3.40.30.10_2.5.1
2c3nA01	3.40.30.10_2.5.1
1b4pA01	3.40.30.10_2.5.1
1oktA01	3.40.30.10_2.5.1
1oyjA01	3.40.30.10_2.5.1
1e6bA01	3.40.30.10_2.5.1
2gsq001	3.40.30.10_2.5.1
2a2rA01	3.40.30.10_2.5.1
1p1xB00	3.20.20.70_4.1.2
1l6wA00	3.20.20.70_4.1.2
1a5cA00	3.20.20.70_4.1.2
1zaiA00	3.20.20.70_4.1.2
1n7kA00	3.20.20.70_4.1.2
1gvfB00	3.20.20.70_4.1.2
2fjkD00	3.20.20.70_4.1.2
1mzhA00	3.20.20.70_4.1.2
1dosA00	3.20.20.70_4.1.2
1o0yA00	3.20.20.70_4.1.2
1w8sE00	3.20.20.70_4.1.2
1ub3A00	3.20.20.70_4.1.2
1mxsA00	3.20.20.70_4.1.2
1nvmA01	3.20.20.70_4.1.3
1hl2B00	3.20.20.70_4.1.3
1h5yB00	3.20.20.70_4.1.3
1thfD00	3.20.20.70_4.1.3
2btmA00	3.20.20.70_5.3.1
1neyA00	3.20.20.70_5.3.1
1w0mA00	3.20.20.70_5.3.1
1qo2A00	3.20.20.70_5.3.1
1o5xA00	3.20.20.70_5.3.1
1hg3A00	3.20.20.70_5.3.1
1n55A00	3.20.20.70_5.3.1
1m6jA00	3.20.20.70_5.3.1
1nsj000	3.20.20.70_5.3.1
1treA00	3.20.20.70_5.3.1
1r2rB00	3.20.20.70_5.3.1
1ep3A00	3.20.20.70_1.3.3
1f76A00	3.20.20.70_1.3.3
1tv5A00	3.20.20.70_1.3.3
1jubA01	3.20.20.70_1.3.3
1d3gA00	3.20.20.70_1.3.3
1dqwA00	3.20.20.70_4.1.1
2czdB00	3.20.20.70_4.1.1
1i4nA00	3.20.20.70_4.1.1
1q6oB00	3.20.20.70_4.1.1
1dbtA00	3.20.20.70_4.1.1
1a53000	3.20.20.70_4.1.1
1dvjA00	3.20.20.70_4.1.1
1eixC00	3.20.20.70_4.1.1
2cu0B00	3.20.20.70_1.1.1
1jcnA00	3.20.20.70_1.1.1
1me8A00	3.20.20.70_1.1.1
1zfjA00	3.20.20.70_1.1.1
1eepA00	3.20.20.70_1.1.1
1b3oA00	3.20.20.70_1.1.1
1ps9A01	3.20.20.70_1.3.1
1gteB05	3.20.20.70_1.3.1
1icpA00	3.20.20.70_1.3.1
2hsaA00	3.20.20.70_1.3.1
1fcqA00	3.20.20.70_3.2.1
1ktbA01	3.20.20.70_3.2.1
2atmA00	3.20.20.70_3.2.1
1uasA01	3.20.20.70_3.2.1
1yxcA00	3.20.20.70_4.2.1
1l6sA00	3.20.20.70_4.2.1
1geqB00	3.20.20.70_4.2.1
1qopA00	3.20.20.70_4.2.1
1h7nA00	3.20.20.70_4.2.1
1pv8B00	3.20.20.70_4.2.1
1w5qB00	3.20.20.70_4.2.1
1sflB00	3.20.20.70_4.2.1
1gqnA00	3.20.20.70_4.2.1
1w1zA00	3.20.20.70_4.2.1
1o5kA00	3.20.20.70_4.2.1
1ujpA00	3.20.20.70_4.2.1
1n8fA00	3.20.20.70_2.5.1
1of8A00	3.20.20.70_2.5.1
1vr6A02	3.20.20.70_2.5.1
1pe1A00	3.20.20.70_2.5.1
1o60A00	3.20.20.70_2.5.1
2tpsB00	3.20.20.70_2.5.1
1xi3A00	3.20.20.70_2.5.1
1cyg003	2.60.40.10_2.4.1
1d3cA04	2.60.40.10_2.4.1
1ciu003	2.60.40.10_2.4.1
1m7xB01	2.60.40.10_2.4.1
1he7A00	2.60.40.10_2.7.10
1wwbX00	2.60.40.10_2.7.10
1iilG02	2.60.40.10_2.7.10
1ev2E01	2.60.40.10_2.7.10
1fltX00	2.60.40.10_2.7.10
1rhfA01	2.60.40.10_2.7.10
1wwcA00	2.60.40.10_2.7.10
1kv3A01	2.60.40.10_2.3.2
1vjjA04	2.60.40.10_2.3.2
1g0dA01	2.60.40.10_2.3.2
1evuA01	2.60.40.10_2.3.2
1ac0000	2.60.40.10_3.2.1
1bf2001	2.60.40.10_3.2.1
1vemA02	2.60.40.10_3.2.1
1qhoA04	2.60.40.10_3.2.1
1clc001	2.60.40.10_3.2.1
1w8oA02	2.60.40.10_3.2.1
1ji1A01	2.60.40.10_3.2.1
1bvzA01	2.60.40.10_3.2.1
1cuk002	1.10.150.20_3.6.1
2h5xB02	1.10.150.20_3.6.1
1d8lA01	1.10.150.20_3.6.1
1ixrB02	1.10.150.20_3.6.1
1jx4A03	1.10.150.20_2.7.7
2fmpA02	1.10.150.20_2.7.7
2bcqA02	1.10.150.20_2.7.7
2kfnA04	1.10.150.20_2.7.7
1lb2B00	1.10.150.20_2.7.7
1bgxT02	1.10.150.20_2.7.7
1k1qA03	1.10.150.20_2.7.7
1aroP05	1.10.150.20_2.7.7
1doqA00	1.10.150.20_2.7.7
2ktqA04	1.10.150.20_2.7.7
1jmsA02	1.10.150.20_2.7.7
1tk5A04	1.10.150.20_2.7.7
1mkaA00	3.10.129.10_4.2.1
1pn2D02	3.10.129.10_4.2.1
1u1zA00	3.10.129.10_4.2.1
1pn2C01	3.10.129.10_4.2.1
1lo7A00	3.10.129.10_3.1.2
1njkA00	3.10.129.10_3.1.2
1c8uA02	3.10.129.10_3.1.2
1s5uE00	3.10.129.10_3.1.2
2tmgA01	3.40.192.10_1.4.1
1gtmA01	3.40.192.10_1.4.1
1bgvA02	3.40.192.10_1.4.1
1hwxA02	3.40.192.10_1.4.1
1nvtA01	3.40.192.10_1.1.1
1p77A01	3.40.192.10_1.1.1
1vi2A01	3.40.192.10_1.1.1
1nytA01	3.40.192.10_1.1.1
1hr7C02	3.30.830.10_3.4.24
1hr6D01	3.30.830.10_3.4.24
1hr6C01	3.30.830.10_3.4.24
1hr6B02	3.30.830.10_3.4.24
1ezvA02	3.30.830.10_1.10.2
1ezvB01	3.30.830.10_1.10.2
1pp9B01	3.30.830.10_1.10.2
1pp9A01	3.30.830.10_1.10.2
1kb9A01	3.30.830.10_1.10.2
2a06A02	3.30.830.10_1.10.2
2a06B02	3.30.830.10_1.10.2
1ekeA01	3.30.420.10_3.1.26
1io2A01	3.30.420.10_3.1.26
1jl1A00	3.30.420.10_3.1.26
1jl2A00	3.30.420.10_3.1.26
1i39A01	3.30.420.10_3.1.26
2kfnA01	3.30.420.10_2.7.7
1j54A00	3.30.420.10_2.7.7
1qssA01	3.30.420.10_2.7.7
1noyB02	3.30.420.10_2.7.7
1xi1A01	3.30.420.10_2.7.7
1x9mA01	3.30.420.10_2.7.7
1ei1A02	3.30.230.10_5.99.1
1zxmB02	3.30.230.10_5.99.1
1s16A02	3.30.230.10_5.99.1
1pvgA02	3.30.230.10_5.99.1
1z5bB03	3.30.230.10_5.99.1
2cz9A01	3.30.230.10_2.7.1
1uekA01	3.30.230.10_2.7.1
1pieA01	3.30.230.10_2.7.1
1kkhA01	3.30.230.10_2.7.1
1kvkA01	3.30.230.10_2.7.1
2h5xA01	2.40.50.140_3.6.1
1pv4A01	2.40.50.140_3.6.1
1t9hA01	2.40.50.140_3.6.1
1a62002	2.40.50.140_3.6.1
1ixrA01	2.40.50.140_3.6.1
1cuk001	2.40.50.140_3.6.1
1l0wA01	2.40.50.140_6.1.1
1wydA01	2.40.50.140_6.1.1
1ntgA00	2.40.50.140_6.1.1
1b8aA01	2.40.50.140_6.1.1
1c0aA01	2.40.50.140_6.1.1
1eovA01	2.40.50.140_6.1.1
1bbuA01	2.40.50.140_6.1.1
1b7yB02	2.40.50.140_6.1.1
1e1oA01	2.40.50.140_6.1.1
1mkhA00	2.40.50.140_6.1.1
1sro000	2.40.50.140_2.7.7
1go3E01	2.40.50.140_2.7.7
1y14D02	2.40.50.140_2.7.7
1p16B02	2.40.50.140_2.7.7
1ckmA02	2.40.50.140_2.7.7
1twfH00	2.40.50.140_2.7.7
2c35B02	2.40.50.140_2.7.7
